# Supplementary material
Source: HighWire-hosted journal article supplement (https://jnm.snmjournals.org/highwire/filestream/93953/field_highwire_adjunct_files/0/54502-Supp-Tables-revised-9-17-08.pdf)
Supplement: 54502-Supp-Tables-revised-9-17-08.pdf [file 54502-Supp-Tables-revised-9-17-08.pdf]

**Supplemental Table 1.** Biodistribution Results of <sup>64</sup>Cu-CB-TE2A-Y3-TATE in Male Lewis Rats (%ID/g)

| Organ                 | 1h             | 4h             | 4h blockade    | 24h            |
|-----------------------|----------------|----------------|----------------|----------------|
| Blood                 | 0.1900±0.0105  | 0.0667±0.0078  | 0.0979±0.0145  | 0.0500±0.0088  |
| Lung                  | 2.5184±0.4101  | 1.1355±0.7863  | 0.2917±0.2641  | 2.9846±5.8587  |
| Liver                 | 0.5436±0.0227  | 0.5103±0.0865  | 0.8195±0.0944  | 0.3508±0.1060  |
| Spleen                | 0.2647±0.0764  | 0.2255±0.0713  | 0.2455±0.0774  | 0.2405±0.1294  |
| Kidney                | 3.3819±1.6598  | 2.1715±0.1379  | 4.6669±0.3335  | 1.6925±0.2874  |
| Muscle                | 0.0812±0.0031  | 0.0374±0.0023  | 0.0388±0.0061  | 0.02255±0.0057 |
| Fat                   | 0.2544±0.3285  | 0.0642±0.0458  | 0.0376±0.0046  | 0.0421±0.0335  |
| Heart                 | 0.1736±0.0152  | 0.1075±0.0135  | 0.0700±0.0071  | 0.0754±0.0117  |
| Brain                 | 0.0187±0.0054  | 0.0083±0.0006  | 0.0103±0.0022  | 0.0082±0.0028  |
| Pituitary             | 7.1467±1.7887  | 5.9289±1.4594  | 0.2630±0.1457  | 4.3085±0.9623  |
| Bone                  | 1.5962±0.1703  | 1.1787±0.1051  | 0.2098±0.0321  | 0.6631±0.0838  |
| Adrenals              | 16.2112±3.4635 | 14.6157±0.7643 | 0.4317±0.0510  | 7.7934±0.7870  |
| Pancreas              | 5.7053±0.4201  | 4.0025±0.2496  | 0.4570±0.0131  | 0.8513±0.1508  |
| Tumor                 | 3.2317±0.6440  | 2.8649±0.5193  | 0.7035±0.0693  | 1.0060±0.1984  |
| Stomach               | 1.9326±0.5090  | 1.0657±0.5789  | 0.01124±0.0324 | 0.4312±0.1137  |
| Small Intestine       | 1.1804±0.1202  | 0.8389±0.0922  | 0.1187±0.0244  | 0.3611±0.0445  |
| Upper Large Intestine | 1.0582±0.0891  | 1.0221±0.1925  | 0.2512±0.0430  | 0.3253±0.0521  |
| Lower Large Intestine | 0.6184±0.0380  | 0.8817±0.0923  | 0.5576±0.1106  | 0.4526±0.0532  |

**Supplemental Table 2.** Biodistribution Results of  $^{64}\text{Cu}$ -CB-TE2A-sst<sub>2</sub>-ANT in Male Lewis Rats (%ID/g)

| Organ                 | 1h             | 4h            | 4h blockade    | 24h           |
|-----------------------|----------------|---------------|----------------|---------------|
| Blood                 | 0.2506±0.0467  | 0.0519±0.0099 | 0.0806±0.0777  | 0.0117±0.0013 |
| Lung                  | 0.6191±0.0854  | 0.2339±0.0288 | 0.3470±0.0752  | 0.0740±0.0410 |
| Liver                 | 0.9232±0.0878  | 1.3234±0.2552 | 1.7642±0.6041  | 0.9421±0.0747 |
| Spleen                | 0.3176±0.0340  | 0.2840±0.0197 | 0.5135±0.2275  | 0.2051±0.0161 |
| Kidney                | 2.9739±0.2881  | 2.8259±0.1071 | 2.1960±0.4197  | 2.5117±0.1748 |
| Muscle                | 0.0976±0.0160  | 0.0262±0.0039 | 0.0360±0.0173  | 0.0090±0.0010 |
| Fat                   | 0.01465±0.0585 | 0.0333±0.0069 | 0.1002±0.0936  | 0.0131±0.0062 |
| Heart                 | 0.1884±0.0248  | 0.0694±0.0060 | 0.0786±0.0416  | 0.0178±0.0025 |
| Brain                 | 0.0147±0.0044  | 0.0071±0.0013 | 0.0060±0.0008  | 0.0024±0.0009 |
| Pituitary             | 3.6893±0.5323  | 1.1736±0.3913 | 0.3423±0.2266  | 0.3039±0.2942 |
| Bone                  | 0.5861±0.0348  | 0.3245±0.263  | 0.1461±0.0151  | 0.1519±0.0253 |
| Adrenals              | 7.8295±1.8835  | 3.4574±0.9927 | 0.4849±0.1641  | 0.5282±0.2813 |
| Pancreas              | 4.7328±0.9601  | 2.5616±0.3802 | 0.4360±0.0558  | 0.3354±0.0315 |
| Tumor                 | 1.6862±0.3690  | 1.8087±0.5539 | 0.4664±0.0882  | 0.8370±0.0561 |
| Stomach               | 0.5109±0.1547  | 0.1847±0.0477 | 0.0885±0.02550 | 0.1039±0.0595 |
| Small Intestine       | 0.3166±0.0645  | 0.1191±0.0136 | 0.1322±0.0763  | 0.0530±0.0112 |
| Upper Large Intestine | 0.4264±0.0403  | 0.2304±0.0811 | 0.2804±0.1150  | 0.0990±0.0177 |
| Lower Large Intestine | 0.3681±0.0293  | 0.3755±0.0454 | 0.2925±0.1383  | 0.2617±0.0424 |
